# Supplementary material
Source: MDPI journal article supplement (https://www.mdpi.com/2077-0472/14/1/7)
Supplement: s1 [file s1]

**Supplementary Material Table S1** Primer sequences of the genes used in this study for qRT-PCR

| <b>Genes</b>   | <b>Gene ID</b> | <b>Forward sequence (5'→3')</b> | <b>Reverse sequence (5'→3')</b> |
|----------------|----------------|---------------------------------|---------------------------------|
| <i>PcRS11</i>  | EF117977.1     | GATGAGATGATGAAGGCACAAAC         | GGAAGTAGAAGTCGGGAAAGTC          |
| <i>PcRS</i>    | DQ900615.1     | GAGATGACGAAGGCACTAACA           | GGAAGTAGAAGTCGGGAAAGTC          |
| <i>PcActin</i> | MK288156.1     | TACAATGAGCTTCGGGTTGC            | GCTCTTTGCAGTTTCCAGCT            |
